# Supplementary material for: Sexual Behaviour and Fantasies in a Group of Young Italian Cohort
Source: MDPI journal article supplement (doi:10.3390/jcm10194327), 2021-09-23
Supplement: s1 [file s1]

# SUPPLEMENTARY MATERIALS

**Table S1.** Sexual pleasure patterns in the all population.

|                                                                                 |             |
|---------------------------------------------------------------------------------|-------------|
| <b>Participants, n=12590</b>                                                    |             |
|                                                                                 |             |
| <b>Secretly observe a naked person, Likert scale</b>                            |             |
| <b>Responders, n (%)</b>                                                        |             |
| 1                                                                               | 3741 (29.7) |
| 2                                                                               | 2734 (21.7) |
| 3                                                                               | 2944 (23.4) |
| 4                                                                               | 2270 (18.0) |
| 5                                                                               | 901 (7.2)   |
| <b>Secretly observe a sexual relationship, Likert scale</b>                     |             |
| <b>Responders, n (%)</b>                                                        |             |
| 1                                                                               | 4568 (36.3) |
| 2                                                                               | 2809 (22.3) |
| 3                                                                               | 2574 (20.4) |
| 4                                                                               | 1731 (13.7) |
| 5                                                                               | 908 (7.2)   |
| <b>Show the genitals to another person who does not expect it, Likert scale</b> |             |
| <b>Responders, n (%)</b>                                                        |             |
| 1                                                                               | 7964 (63.3) |
| 2                                                                               | 1916 (15.2) |
| 3                                                                               | 1292 (10.3) |
| 4                                                                               | 866 (6.9)   |
| 5                                                                               | 552 (4.4)   |
| <b>Touch or rub against an unwilling person , Likert scale</b>                  |             |
| <b>Responders, n (%)</b>                                                        |             |
| 1                                                                               | 9461 (75.1) |
| 2                                                                               | 1114 (8.8)  |
| 3                                                                               | 791 (6.3)   |
| 4                                                                               | 691 (5.5)   |
| 5                                                                               | 533 (4.2)   |
| <b>Feel pain , Likert scale</b>                                                 |             |
| <b>Responders, n (%)</b>                                                        |             |
| 1                                                                               | 7232 (57.4) |
| 2                                                                               | 2042 (16.2) |
| 3                                                                               | 1733 (13.8) |
| 4                                                                               | 1114 (8.8)  |
| 5                                                                               | 469 (3.7)   |
| <b>Hit and hurt , Likert scale</b>                                              |             |
| <b>Responders, n (%)</b>                                                        |             |

|                                                                           |              |
|---------------------------------------------------------------------------|--------------|
| 1                                                                         | 8244 (65.5)  |
| 2                                                                         | 2002 (15.9)  |
| 3                                                                         | 1285 (10.2)  |
| 4                                                                         | 747 (5.9)    |
| 5                                                                         | 312 (2.5)    |
| <b>Humiliated Psychologically , Likert scale</b>                          |              |
| <b>Responders, n (%)</b>                                                  |              |
| 1                                                                         | 11158 (88.6) |
| 2                                                                         | 642 (5.1)    |
| 3                                                                         | 386 (3.1)    |
| 4                                                                         | 237 (1.9)    |
| 5                                                                         | 167 (1.3)    |
| <b>Humiliates Psychologically, Likert scale</b>                           |              |
| <b>Responders, n (%)</b>                                                  |              |
| 1                                                                         | 10794 (85.7) |
| 2                                                                         | 902 (7.2)    |
| 3                                                                         | 467 (3.7)    |
| 4                                                                         | 275 (2.2)    |
| 5                                                                         | 152 (1.2)    |
| <b>Being tied up, Likert scale</b>                                        |              |
| <b>Responders, n (%)</b>                                                  |              |
| 1                                                                         | 3602 (28.6)  |
| 2                                                                         | 1891 (15.0)  |
| 3                                                                         | 2859 (22.7)  |
| 4                                                                         | 2486 (19.7)  |
| 5                                                                         | 1752 (13.9)  |
| <b>Sex with animals, Likert scale</b>                                     |              |
| <b>Responders, n (%)</b>                                                  |              |
| 1                                                                         | 12191 (96.8) |
| 2                                                                         | 230 (1.8)    |
| 3                                                                         | 89 (0.7)     |
| 4                                                                         | 59 (0.5)     |
| 5                                                                         | 21 (0.2)     |
| <b>Sex with corpses, Likert scale</b>                                     |              |
| <b>Responders, n (%)</b>                                                  |              |
| 1                                                                         | 12406 (98.5) |
| 2                                                                         | 103 (0.8)    |
| 3                                                                         | 42 (0.3)     |
| 4                                                                         | 20 (0.2)     |
| 5                                                                         | 19 (0.2)     |
| <b>Dressing in clothes or underwear of the opposite sex, Likert scale</b> |              |
| <b>Responders, n (%)</b>                                                  |              |

|                                                                           |              |
|---------------------------------------------------------------------------|--------------|
| 1                                                                         | 10185 (80.9) |
| 2                                                                         | 1123 (8.9)   |
| 3                                                                         | 735 (5.8)    |
| 4                                                                         | 359 (2.9)    |
| 5                                                                         | 188 (1.5)    |
| <b>Sex with people younger than 20 years against you, Likert scale</b>    |              |
| <b>Responders, n (%)</b>                                                  |              |
| 1                                                                         | 10825 (86.0) |
| 2                                                                         | 657 (5.2)    |
| 3                                                                         | 500 (4.0)    |
| 4                                                                         | 351 (2.8)    |
| 5                                                                         | 257 (2.0)    |
| <b>Sex with people older than 20 years against you, Likert scale</b>      |              |
| <b>Responders, n (%)</b>                                                  |              |
| 1                                                                         | 5608 (44.5)  |
| 2                                                                         | 1888 (15.0)  |
| 3                                                                         | 2279 (18.1)  |
| 4                                                                         | 1806 (14.3)  |
| 5                                                                         | 1009 (8.0)   |
| <b>Sex with people with physical disabilities, Likert scale</b>           |              |
| <b>Responders, n (%)</b>                                                  |              |
| 1                                                                         | 11535 (91.6) |
| 2                                                                         | 654 (5.2)    |
| 3                                                                         | 329 (2.6)    |
| 4                                                                         | 45 (0.4)     |
| 5                                                                         | 27 (0.2)     |
| <b>Sex with people with mental disabilities, Likert scale</b>             |              |
| <b>Responders, n (%)</b>                                                  |              |
| 1                                                                         | 12023 (95.5) |
| 2                                                                         | 369 (2.9)    |
| 3                                                                         | 148 (1.2)    |
| 4                                                                         | 25 (0.2)     |
| 5                                                                         | 25 (0.2)     |
| <b>Exclusive attraction for a specific part of the body, Likert scale</b> |              |
| <b>Responders, n (%)</b>                                                  |              |
| 1                                                                         | 6151 (48.9)  |
| 2                                                                         | 1592 (12.6)  |
| 3                                                                         | 2201 (17.5)  |
| 4                                                                         | 1586 (12.6)  |
| 5                                                                         | 1060 (8.4)   |
| <b>Which part of the body, Likert scale</b>                               |              |
| <b>Responders, n (%)</b>                                                  |              |

|                                                        |              |
|--------------------------------------------------------|--------------|
| Breast                                                 | 859 (18.9)   |
| Genitals                                               | 423 (9.3)    |
| Buttocks                                               | 401 (8.8)    |
| Feet                                                   | 320 (7)      |
| Hands                                                  | 300 (6.6)    |
| Everything                                             | 651 (14.3)   |
| Other                                                  | 9636 (35.1)  |
| <b>Urinating on someone, Likert scale</b>              |              |
| <b>Responders, n (%)</b>                               |              |
| 1                                                      | 11277 (89.6) |
| 2                                                      | 621 (4.9)    |
| 3                                                      | 395 (3.1)    |
| 4                                                      | 173 (1.4)    |
| 5                                                      | 124 (1.0)    |
| <b>Being urinated on him, Likert scale</b>             |              |
| <b>Responders, n (%)</b>                               |              |
| 1                                                      | 11461 (91.0) |
| 2                                                      | 482 (3.8)    |
| 3                                                      | 329 (2.6)    |
| 4                                                      | 198 (1.6)    |
| 5                                                      | 120 (1.0)    |
| <b>Exciting in the absence of oxygen, Likert scale</b> |              |
| <b>Responders, n (%)</b>                               |              |
| 1                                                      | 10065 (79.9) |
| 2                                                      | 1086 (8.6)   |
| 3                                                      | 735 (5.8)    |
| 4                                                      | 467 (3.7)    |
| 5                                                      | 237 (1.9)    |
| <b>Inducing lack of oxygen, Likert scale</b>           |              |
| <b>Responders, n (%)</b>                               |              |
| 1                                                      | 10480 (83.2) |
| 2                                                      | 829 (6.6)    |
| 3                                                      | 684 (5.4)    |
| 4                                                      | 421 (3.3)    |
| 5                                                      | 176 (1.4)    |
| <b>Sex with more people, Likert scale</b>              |              |
| <b>Responders, n (%)</b>                               |              |
| 1                                                      | 3000 (23.8)  |
| 2                                                      | 2115 (16.8)  |
| 3                                                      | 3412 (27.1)  |
| 4                                                      | 2543 (20.2)  |
| 5                                                      | 1520 (12.1)  |

|                                                                              |              |
|------------------------------------------------------------------------------|--------------|
| <b>Observing the partner who has relationships with others, Likert scale</b> |              |
| <b>Responders, n (%)</b>                                                     |              |
| 1                                                                            | 10741 (85.3) |
| 2                                                                            | 832 (6.6)    |
| 3                                                                            | 560 (4.4)    |
| 4                                                                            | 291 (2.3)    |
| 5                                                                            | 166 (1.3)    |
| <b>Exchange of couples, Likert scale</b>                                     |              |
| <b>Responders, n (%)</b>                                                     |              |
| 1                                                                            | 9135 (72.6)  |
| 2                                                                            | 1351 (10.7)  |
| 3                                                                            | 1187 (9.4)   |
| 4                                                                            | 597 (4.7)    |
| 5                                                                            | 320 (2.5)    |
| <b>Blindfolded sex, Likert scale</b>                                         |              |
| <b>Responders, n (%)</b>                                                     |              |
| 1                                                                            | 2747 (21.8)  |
| 2                                                                            | 1677 (13.3)  |
| 3                                                                            | 3211 (25.5)  |
| 4                                                                            | 2853 (22.7)  |
| 5                                                                            | 2102 (16.7)  |
| <b>Recover during sexual masturbation, Likert scale</b>                      |              |
| <b>Responders, n (%)</b>                                                     |              |
| 1                                                                            | 5078 (40.3)  |
| 2                                                                            | 2082 (16.5)  |
| 3                                                                            | 2365 (18.8)  |
| 4                                                                            | 1869 (14.8)  |
| 5                                                                            | 1196 (9.5)   |
| <b>Sex with pregnant women, Likert scale</b>                                 |              |
| <b>Responders, n (%)</b>                                                     |              |
| 1                                                                            | 10548 (83.8) |
| 2                                                                            | 958 (7.6)    |
| 3                                                                            | 623 (4.9)    |
| 4                                                                            | 265 (2.1)    |
| 5                                                                            | 196 (1.6)    |
| <b>Observed while having sex/during masturbation, Likert scale</b>           |              |
| <b>Responders, n (%)</b>                                                     |              |
| 1                                                                            | 7217 (57.3)  |
| 2                                                                            | 1869 (14.8)  |
| 3                                                                            | 1720 (13.7)  |
| 4                                                                            | 1054 (8.4)   |
| 5                                                                            | 730 (5.8)    |

| Sex in a public place, Likert scale |             |
|-------------------------------------|-------------|
| Responders, n (%)                   |             |
| 1                                   | 2482 (19.7) |
| 2                                   | 2066 (16.4) |
| 3                                   | 3246 (25.8) |
| 4                                   | 2791 (22.2) |
| 5                                   | 2005 (15.9) |

**Table S2.** Contraception use in the all cohort.

|                                                                                                               |             |
|---------------------------------------------------------------------------------------------------------------|-------------|
| Patients, n=12590                                                                                             |             |
|                                                                                                               |             |
| <b>Do you use contraceptive methods?</b>                                                                      |             |
| <b>Responders, n (%)</b>                                                                                      |             |
| Ring                                                                                                          | 11 (0.1)    |
| Hormonal Contraceptive                                                                                        | 1977 (15.7) |
| Natural Methods                                                                                               | 582 (4.6)   |
| Spiral                                                                                                        | 58 (0.5)    |
| I Don't Use It                                                                                                | 1571 (12.5) |
| I Don't Make Sex                                                                                              | 69 (0.5)    |
| Preservation                                                                                                  | 8311 (66.0) |
| Spermicides                                                                                                   | 5 (0.0)     |
| Sterilization                                                                                                 | 2 (0.0)     |
| <b>How often does condom (male or female) use to protect you from sexually transmitted infections (STIs)?</b> |             |
| <b>Responders, n (%)</b>                                                                                      |             |
| Never                                                                                                         | 3512 (27.9) |
| About 25%                                                                                                     | 1536 (12.2) |
| About in the middle                                                                                           | 836 (6.6)   |
| About 75%                                                                                                     | 2041 (16.2) |
| In all relationships                                                                                          | 4665 (37.1) |
| <b>What reasons push you to NOT use sexually transmitted infections (STIs) protections?</b>                   |             |
| <b>Responders, n (%)</b>                                                                                      |             |
| I always use them                                                                                             | 4103 (32.6) |
| I am sure that the partner does not have MST                                                                  | 5968 (47.4) |
| they interrupt the relationship                                                                               | 245 (1.9)   |
| I trust the prtnr                                                                                             | 1633 (13.0) |
| I feel less pleasure                                                                                          | 641 (5.1)   |
|                                                                                                               |             |

**Table S3.** Sexual intercourse patterns.

|                                                                              |              |
|------------------------------------------------------------------------------|--------------|
| Patients, n=12590                                                            |              |
|                                                                              |              |
| <b>Have you ever paid for sex?</b>                                           |              |
| <b>Responders, n (%)</b>                                                     |              |
| Yes                                                                          | 492 (3.9)    |
| No                                                                           | 12098 (96.1) |
| <b>Have you ever been paid for sex?</b>                                      |              |
| <b>Responders, n (%)</b>                                                     |              |
| Yes                                                                          | 254 (2.0)    |
| No                                                                           | 12336 (98.0) |
| <b>Partners to date, number median (IQR)</b>                                 | 3 (1-5)      |
| <b>Do you practice passive anal sex?</b>                                     |              |
| <b>Responders, n (%)</b>                                                     |              |
| Yes                                                                          | 2475 (19.7)  |
| No                                                                           | 10115 (80.3) |
| <b>Do you practice active anal sex?</b>                                      |              |
| <b>Responders, n (%)</b>                                                     |              |
| Yes                                                                          | 1830 (14.5)  |
| No                                                                           | 10760 (85.5) |
| <b>How many penetrative sexual intercourse do you have in a month?</b>       |              |
| <b>Responders, n (%)</b>                                                     |              |
| Nobody                                                                       | 1509 (12.0)  |
| Less Than 4                                                                  | 2563 (20.4)  |
| More Than 4                                                                  | 4420 (35.1)  |
| More Than 10                                                                 | 4098 (32.5)  |
| <b>How many non-penetrative sexual intercourse do you have in a month?</b>   |              |
| <b>Responders, n (%)</b>                                                     |              |
| Nobody                                                                       | 2291 (18.2)  |
| Less Than 4                                                                  | 2510 (19.9)  |
| More Than 4                                                                  | 3809 (30.3)  |
| More Than 10                                                                 | 3980 (31.6)  |
| <b>How many masturbatory acts does it have in a month?</b>                   |              |
| <b>Responders, n (%)</b>                                                     |              |
| Nobody                                                                       | 825 (6.6)    |
| Less Than 4                                                                  | 1930 (15.3)  |
| More Than 4                                                                  | 3170 (25.2)  |
| More Than 10                                                                 | 6665 (52.9)  |
| <b>Longest period of sexual abstinence in your life, months median (IQR)</b> | 4 (2-10)     |



|                                                                                                                          |              |
|--------------------------------------------------------------------------------------------------------------------------|--------------|
| <b>Do you reach orgasm during a relationship?</b>                                                                        |              |
| <b>Responders, n (%)</b>                                                                                                 |              |
| Never                                                                                                                    | 888 (7.1)    |
| Rarely                                                                                                                   | 1906 (15.1)  |
| Often                                                                                                                    | 5181 (41.2)  |
| Always                                                                                                                   | 4615 (36.7)  |
| <b>Have you ever had multiple orgasms (multiple consecutive orgasms)?</b>                                                |              |
| <b>Responders, n (%)</b>                                                                                                 |              |
| Yes                                                                                                                      | 6053 (48.1)  |
| No                                                                                                                       | 6537 (51.9)  |
| <b>Do you define yourself as a stressed person?</b>                                                                      |              |
| <b>Responders, n (%)</b>                                                                                                 |              |
| Yes                                                                                                                      | 7796 (61.9)  |
| No                                                                                                                       | 4794 (38.1)  |
| <b>Have had sexual experiences that I may have negatively affected my sex life (e.g. harassment, abuse, violence...)</b> |              |
| <b>Responders, n (%)</b>                                                                                                 |              |
| Yes                                                                                                                      | 2084 (16.6)  |
| No                                                                                                                       | 10506 (83.4) |
| <b>Have you ever had sex with colleagues?</b>                                                                            |              |
| <b>Responders, n (%)</b>                                                                                                 |              |
| Yes                                                                                                                      | 2155 (17.1)  |
| No                                                                                                                       | 10435 (82.9) |
| <b>Have you ever cheated on your partner (now or in the past)?</b>                                                       |              |
| <b>Responders, n (%)</b>                                                                                                 |              |
| Yes                                                                                                                      | 3418 (27.1)  |
| No                                                                                                                       | 9172 (72.9)  |
| <b>Do you consider yourself sexually satisfied?</b>                                                                      |              |
| <b>Responders, n (%)</b>                                                                                                 |              |
| Yes                                                                                                                      | 8991 (71.4)  |
| No                                                                                                                       | 3599 (28.6)  |
| <b>If you don't already have any, do you want children?</b>                                                              |              |
| <b>Responders, n (%)</b>                                                                                                 |              |
| Yes                                                                                                                      | 8471 (67.3)  |
| No                                                                                                                       | 3680 (29.2)  |
| I already have children                                                                                                  | 439 (3.5)    |

**Table S4.** Dating app use in the all cohort.

|                                                                                 |              |
|---------------------------------------------------------------------------------|--------------|
| Participants, n=12590                                                           |              |
| <b>What dating sites / apps do you usually use?</b>                             |              |
| <b>Responders, n (%)</b>                                                        |              |
| Adotta Un Ragazzo                                                               | 8 (0.1)      |
| Annunci69                                                                       | 4 (0.0)      |
| Badoo                                                                           | 209 (1.7)    |
| Bakeka Incontri                                                                 | 5 (0.0)      |
| Connected To Me                                                                 | 7 (0.1)      |
| Grinder                                                                         | 104 (0.8)    |
| Happn                                                                           | 17 (0.1)     |
| Instagram                                                                       | 9 (0.1)      |
| Kik                                                                             | 10 (0.1)     |
| Lovoo                                                                           | 402 (3.2)    |
| Meetic                                                                          | 146 (1.2)    |
| Ok Cupid                                                                        | 9 (0.1)      |
| Omegle                                                                          | 13 (0.1)     |
| Sayhi                                                                           | 6 (0.1)      |
| Tinder                                                                          | 836 (6.6)    |
| Wapa                                                                            | 55 (0.4)     |
| None                                                                            | 10750 (85.4) |
| <b>Which of these social networks do you use to meet new partners?</b>          |              |
| <b>Responders, n (%)</b>                                                        |              |
| Facebook                                                                        | 2438 (19.4)  |
| Instagram                                                                       | 3789 (30.1)  |
| Snapchat                                                                        | 8 (0.1)      |
| Telegram                                                                        | 65 (0.5)     |
| Twitter                                                                         | 12 (0.1)     |
| Others                                                                          | 20 (0.2)     |
| None                                                                            | 6258 (49.7)  |
| <b>What are you looking for in a dating app / site or on social media?</b>      |              |
| <b>Responders, n (%)</b>                                                        |              |
| Lover                                                                           | 41 (0.3)     |
| Friendship                                                                      | 2569 (20.4)  |
| Occasional Partner                                                              | 1443 (11.5)  |
| Stable Partner                                                                  | 507 (4.0)    |
| Virtual Relationship                                                            | 57 (0.5)     |
| I don't use them                                                                | 7973 (63.3)  |
| <b>How often do you use dating / social apps / sites to look for a partner?</b> |              |

| <b>Responders, n (%)</b>                                                                     |             |
|----------------------------------------------------------------------------------------------|-------------|
| Never                                                                                        | 9355 (74.3) |
| Few Times A Year                                                                             | 1745 (13.9) |
| About Once A Month                                                                           | 290 (2.3)   |
| About Once A Week                                                                            | 181 (1.4)   |
| Several Times A Month                                                                        | 282 (2.2)   |
| Several Time A Week                                                                          | 363 (2.9)   |
| Several Times A Day                                                                          | 171 (1.4)   |
| Every Day                                                                                    | 203 (1.6)   |
| <b>What reasons motivate you to use dating or social apps / sites to look for a partner?</b> |             |
| <b>Responders, n (%)</b>                                                                     |             |
| No Particular Reason                                                                         | 127 (1.0)   |
| Curiosities                                                                                  | 6 (0.0)     |
| Discretion                                                                                   | 153 (1.2)   |
| It Is Fun                                                                                    | 12 (0.1)    |
| It Is Easier To Have Sexual Intercourse                                                      | 111 (0.9)   |
| You Can Have More Freedom                                                                    | 148 (1.2)   |
| Is Easier                                                                                    | 990 (7.9)   |
| Greater Availability Of The Pertner                                                          | 71 (0.6)    |
| You Don't Have To Expose Yourself                                                            | 434 (3.4)   |
| You Can Meet More People                                                                     | 1085 (8.6)  |
| Save Time                                                                                    | 624 (5.0)   |
| I Don't Use Them                                                                             | 8829 (70.1) |
| <b>How often do you send nude / genital photos?</b>                                          |             |
| <b>Responders, n (%)</b>                                                                     |             |
| Never                                                                                        | 6558 (52.1) |
| Few Times A Year                                                                             | 2922 (23.2) |
| About Once A Month                                                                           | 926 (7.4)   |
| About Once A Week                                                                            | 446 (3.5)   |
| Several Times A Month                                                                        | 1062 (8.4)  |
| Several Time A Week                                                                          | 576 (4.6)   |
| Several Times A Day                                                                          | 40 (0.3)    |
| Every Day                                                                                    | 60 (0.5)    |
| <b>How frequently do you receive nude / genital photos?</b>                                  |             |
| <b>Responders, n (%)</b>                                                                     |             |
| Never                                                                                        | 5320 (42.3) |
| Few Times A Year                                                                             | 3623 (28.8) |
| About Once A Month                                                                           | 1129 (9.0)  |
| About Once A Week                                                                            | 425 (3.4)   |
| Several Times A Month                                                                        | 1247 (9.9)  |
| Several Time A Week                                                                          | 656 (5.2)   |

|                                                                          |             |
|--------------------------------------------------------------------------|-------------|
| Several Times A Day                                                      | 82 (0.7)    |
| Every Day                                                                | 108 (0.9)   |
| <b>How did you meet your current partner or the last partner you had</b> |             |
| <b>Responders, n (%)</b>                                                 |             |
| At Work                                                                  | 394 (3.1)   |
| At School                                                                | 860 (6.8)   |
| Common Event (Party, Concert, Wedding, Etc.)                             | 155 (1.2)   |
| University                                                               | 281 (2.2)   |
| Mutual Friends                                                           | 6803 (54.0) |
| Childhood / Family Friends                                               | 45 (0.4)    |
| Common Hobbies (Sports, Music, Theater)                                  | 210 (1.7)   |
| Casually                                                                 | 1333 (10.6) |
| Chat / Social / Dating App                                               | 2112 (16.8) |
| He Had Been My Friend For A Long Time                                    | 100 (0.8)   |
| Online Game                                                              | 12 (0.1)    |
| On Vacation                                                              | 183 (1.5)   |
| I Don't Have A Partner                                                   | 102 (0.8)   |
